# Supplementary material for: Socioeconomic risk markers of arthropod-borne virus (arbovirus) infections: a systematic literature review and meta-analysis
Source: HighWire-hosted journal article supplement (doi:10.1136/bmjgh-2021-007735), 2022-04-01
Supplement: bmjgh-2021-007735supp002_data_supplement.pdf [file bmjgh-2021-007735supp002_data_supplement.pdf]

**Supplementary Material 2: Inclusion and exclusion criteria**

| <b>Inclusion Criteria</b>  |                                                                                                                                                                                                                                                |
|----------------------------|------------------------------------------------------------------------------------------------------------------------------------------------------------------------------------------------------------------------------------------------|
| Types of studies           | Publication date: 1980 to 2020                                                                                                                                                                                                                 |
|                            | Studies from any geographical location.                                                                                                                                                                                                        |
|                            | English, Spanish, Portuguese and French language.                                                                                                                                                                                              |
|                            | Studies using quantitative methods: Observational case reports, case series, cross-sectional, case-control and cohort studies.                                                                                                                 |
| Types of participants      | All ages acceptable.                                                                                                                                                                                                                           |
| Types of exposure measures | Socioeconomic position and/or proxy measures of socioeconomic position at an individual level, such as social class, living conditions, education, household income, ethnicity if directly linked to socioeconomic status and asset ownership. |
| Types of outcome measures  | Occurrence of infections due to arboviruses with mosquito vectors                                                                                                                                                                              |

| <b>Exclusion Criteria</b> |                                                                                                                                                     |
|---------------------------|-----------------------------------------------------------------------------------------------------------------------------------------------------|
| Types of studies          | Grey literature / not published in a peer reviewed journal, ecological study designs/spatial analyses with no indication of individual risk factors |
|                           | Treatment guidelines documents, other systematic reviews                                                                                            |
| Dates of studies          | <1980s                                                                                                                                              |
| Types of outcome measures | Economic burden of arbovirus (e.g., economic evaluation of costs of disease to families or governments).                                            |
