# Supplementary material for: Socioeconomic risk markers of arthropod-borne virus (arbovirus) infections: a systematic literature review and meta-analysis
Source: HighWire-hosted journal article supplement (doi:10.1136/bmjgh-2021-007735), 2022-04-01
Supplement: bmjgh-2021-007735supp003_data_supplement.pdf [file bmjgh-2021-007735supp003_data_supplement.pdf]

Supplementary Table 1. Bias assessment using the Newcastle-Ottawa scale (NOS) for individual-level studies for cross-sectional and cohort (A) and case-control (B)

| Author(s)                      | Year of | Selection (4)                                                            |                                     |                           |                                                                  | Comparability (2)               |                                                      | Outcome (3)           |                                |                       | Total Score | Study design                  | Study description                                                                                                                                                                                                                                                |
|--------------------------------|---------|--------------------------------------------------------------------------|-------------------------------------|---------------------------|------------------------------------------------------------------|---------------------------------|------------------------------------------------------|-----------------------|--------------------------------|-----------------------|-------------|-------------------------------|------------------------------------------------------------------------------------------------------------------------------------------------------------------------------------------------------------------------------------------------------------------|
|                                |         | Representativeness of the Exposed Cohort                                 | Selection of the Non-Exposed Cohort | Ascertainment of Exposure | Demonstration That Outcomes of Interest was Not Present at Start | Comparable in Main Factor (age) | Comparability in other controlled factors (i.e. sex) | Assessment of Outcome | Sufficient period of follow up | Adequacy of follow up |             |                               |                                                                                                                                                                                                                                                                  |
| Abd-Jamil, I., et al.          | 2020    | 1                                                                        | 1                                   | 1                         | 1                                                                | 1                               | 1                                                    | 1                     | 1                              | 1                     | 6           | Cross-sectional               | This present study was performed to investigate the seroprevalence of dengue among the Orang Asli (OA) residing at the forest fringe areas of Peninsular Malaysia and determine the factors that could affect the seroprevalence of dengue.                      |
| Ahlin, C., et al.              | 2014    | 1                                                                        | 1                                   | 1                         | 1                                                                | 1                               | 1                                                    | 1                     | 1                              | 1                     | 6           | Cross-sectional               | Seroprevalence study to determine seroprevalence of SIVV and associated risk factors.                                                                                                                                                                            |
| Al-Raddadi et al.              | 2019    | 1                                                                        | 1                                   | 1                         | 1                                                                | 1                               | 1                                                    | 1                     | 1                              | 1                     | 6           | Cross-sectional               | To estimate the seroprevalence of dengue in these regions and the risk factors associated with acute serology.                                                                                                                                                   |
| Anjos et al.                   | 2020    | 1                                                                        | 1                                   | 1                         | 1                                                                | 0                               | 0                                                    | 1                     | 1                              | 1                     | 4           | Cross-sectional               | Investigate factors associated with prior CHIKV infection.                                                                                                                                                                                                       |
| Bartley, L.M., et al.          | 2002    | 0 (only typhoid patients)                                                | 1                                   | 1                         | 1                                                                | 1                               | 1                                                    | 1                     | 1                              | 1                     | 5           | Cross-sectional               | Study assesses associations between sociodemographic factors and dengue and Japanese encephalitis seroprevalence in Southern Vietnam.                                                                                                                            |
| Brunkard, J. M., et al.        | 2007    | 0 (more females than male)                                               | 1                                   | 1                         | 1                                                                | 1                               | 1                                                    | 1                     | 1                              | 1                     | 5           | Cross-sectional               | Cross-sectional serosurvey used to assess dengue seroprevalence in the southern Texas-Mexico border and assess associated risk factors.                                                                                                                          |
| Burger-Calderon, R., et al.    | 2018    | 1                                                                        | 1                                   | 1                         | 0                                                                | 1                               | 1                                                    | 1                     | 1                              | 1                     | 8           | Cohort                        | Study assessing the prevalence of ZIKV and its social determinants in Nicaragua.                                                                                                                                                                                 |
| Charavallot-Neto, F., et al.   | 2019    | 1                                                                        | 1                                   | 1                         | 0                                                                | 1                               | 1                                                    | 1                     | 1                              | 1                     | 8           | Cross-sectional/cohort        | Seroprevalence study to determine seroprevalence and incidence of DENV and identify if SES and demographic covariates are associated with seropositivity.                                                                                                        |
| Comlan, J. V., et al.          | 2015    | 1                                                                        | 1                                   | 1                         | 1                                                                | 0                               | 0                                                    | 1                     | 1                              | 1                     | 4           | Cross-sectional               | Seroprevalence study to determine seroprevalence of Flaviviruses (JEV and DENV) and associated risk factors.                                                                                                                                                     |
| Da Silva-Nunes, M., et al.     | 2008    | 1                                                                        | 1                                   | 1                         | 1                                                                | 1                               | 1                                                    | 1                     | 1                              | 1                     | 6           | Cross-sectional               | Seroprevalence study to determine seroprevalence of DENV in Amazonian region of Brazil and associated risk factors.                                                                                                                                              |
| Edigal, M. H., et al.          | 2020    | 1                                                                        | 1                                   | 1                         | 1                                                                | 1                               | 1                                                    | 1                     | 1                              | 1                     | 6           | Cross-sectional               | In the present investigation, a cross-sectional study was conducted to advance an understanding of the prevalence of DENV and associated risk factors were determined in Kozhikode State, India.                                                                 |
| Foumet, F., et al.             | 2016    | 1                                                                        | 1                                   | 1                         | 1                                                                | 1                               | 1                                                    | 1                     | 1                              | 1                     | 6           | Cross-sectional               | Seroprevalence study to analyse Flavivirus prevalence relative to the socioeconomic, demographic, health and environmental data concerning children, their family and household and the district.                                                                |
| Hortton, J., et al.            | 2019    | 0 (only acutely ill patients in hospital)                                | 1                                   | 1                         | 1                                                                | 0                               | 0                                                    | 1                     | 1                              | 1                     | 6           | Cohort study                  | This seroprevalence study aimed to investigate the frequency of alphavirus and flavivirus incident infections in two regions in Kenya and identify potential risk factors.                                                                                       |
| Hing, Q., et al.               | 2020    | 1                                                                        | 1                                   | 1                         | 1                                                                | 1                               | 1                                                    | 1                     | 1                              | 1                     | 6           | Cross-sectional               | A cross-sectional serosurvey using a stratified random sampling method among individuals aged 1-84 years-old in 7 communities in Guangzhou with no reported dengue cases before 2014 was performed.                                                              |
| Kemneson, A., et al.           | 2017    | 0 (2/3 of cases are referred from MDH health facilities)                 | 1                                   | 1                         | 1                                                                | 1                               | 1                                                    | 1                     | 1                              | 1                     | 5           | Cross-sectional               | The authors conducted a household-level study to identify KAP and social-ecological risk factors associated with acute or recent DENV infections in the city of Machakos, Kenya.                                                                                 |
| Khan, J., et al.               | 2018    | 1                                                                        | 1                                   | 1                         | 1                                                                | 0                               | 0                                                    | 1                     | 1                              | 1                     | 4           | Cross-sectional               | Conducted enhanced, community-based surveillance in the only public emergency unit in a slum in Salvador, Brazil to identify acute febrile illness (AFI) patients with laboratory evidence of dengue.                                                            |
| Kikuti, M., et al.             | 2015    | 0 (only acutely febrile patients)                                        | 1                                   | 1                         | 1                                                                | 1                               | 1                                                    | 1                     | 1                              | 1                     | 5           | Cross-sectional               | Conducted enhanced, community-based surveillance in the only public emergency unit in a slum in Salvador, Brazil to identify acute febrile illness (AFI) patients with laboratory evidence of dengue.                                                            |
| Kuan, G., et al.               | 2016    | 1                                                                        | 1                                   | 1                         | 1                                                                | 1                               | 1                                                    | 1                     | 1                              | 1                     | 9           | Community based cohort (0-14) | Two studies were conducted to analyse the seroprevalence of CHIKV after the first chikungunya epidemic in a community-based cohort of children ages 2-14 years and a cross-sectional survey of persons over 15 years old in the same area of Managua, Nicaragua. |
|                                |         | 0 (more females)                                                         | 1                                   | 1                         | 1                                                                | 1                               | 1                                                    | 1                     | 1                              | 1                     | 5           | Cross-sectional (>15 yo)      |                                                                                                                                                                                                                                                                  |
| Liu, J., et al.                | 2018    | 0 (more females)                                                         | 1                                   | 1                         | 1                                                                | 0                               | 0                                                    | 1                     | 1                              | 1                     | 3           | Cross-sectional               | This cross-sectional study explored the seroprevalence of dengue virus infection in Guangzhou.                                                                                                                                                                   |
| Nakkhara, P., et al.           | 2013    | 0 (more females)                                                         | 1                                   | 1                         | 1                                                                | 1                               | 1                                                    | 1                     | 1                              | 1                     | 5           | Cross-sectional               |                                                                                                                                                                                                                                                                  |
| Nair, I. A., et al.            | 2017    | 0 (patients with febrile illness)                                        | 1                                   | 1                         | 1                                                                | 0                               | 0                                                    | 1                     | 1                              | 1                     | 3           | Cross-sectional               |                                                                                                                                                                                                                                                                  |
| Obaidat, M. M. and A. A. Roess | 2018    | 1                                                                        | 1                                   | 1                         | 1                                                                | 1                               | 1                                                    | 1                     | 1                              | 1                     | 6           | Cross-sectional               | Seroprevalence study to understand the prevalence of DENV in Jordan and assess risk factors that may be associated with increased seropositivity.                                                                                                                |
| Obaidat, M. M., et al.         | 2019    | 1                                                                        | 1                                   | 1                         | 1                                                                | 1                               | 1                                                    | 1                     | 1                              | 1                     | 6           | Cross-sectional               |                                                                                                                                                                                                                                                                  |
| Ochieng, C., et al.            | 2015    | 0 (only HIV negative samples)                                            | 1                                   | 1                         | 1                                                                | 1                               | 0 (did not adjust for sex)                           | 1                     | 1                              | 1                     | 3           | Cross-sectional               | Seroprevalence study to understand the prevalence of DENV, CHIKC and RVFC in Kenya and associated risk factors.                                                                                                                                                  |
| Omatola, C. A., et al.         | 2020    | 0 (Only included patients who had fever and suspected dengue or malaria) | 1                                   | 1                         | 1                                                                | 0                               | 0                                                    | 1                     | 1                              | 1                     | 3           | Cross-sectional               | This study identifies past exposure to DENV among people in Anyigba, located in the Guirga-Saramba region, Nigeria.                                                                                                                                              |
| Omatola, C. A., et al.         | 2020    | 0 (Only patients with febrile illness were included)                     | 1                                   | 1                         | 1                                                                | 0                               | 0                                                    | 1                     | 1                              | 1                     | 3           | Cross-sectional               | This study identifies recent CHIKV infection in Anyigba, Nigeria.                                                                                                                                                                                                |
| Pereira, Y., et al.            | 2015    | 1                                                                        | 1                                   | 1                         | 1                                                                | 1                               | 0                                                    | 1                     | 1                              | 1                     | 5           | Cross-sectional               | Study to establish the seroprevalence of infection by the dengue virus in a district of the Paranaíba region, Brazil.                                                                                                                                            |
| Pessanha, J.E.M., et al.       | 2010    | 1                                                                        | 1                                   | 1                         | 1                                                                | 1                               | 0                                                    | 1                     | 1                              | 1                     | 5           | Cross-sectional               | Study to determine dengue seroprevalence for to different viral serotypes in three districts in Belo Horizonte, Brazil.                                                                                                                                          |
| Piedrahita, L. D., et al.      | 2018    | 1                                                                        | 1                                   | 1                         | 1                                                                | 1                               | 0                                                    | 1                     | 1                              | 1                     | 5           | Cross-sectional               | This longitudinal serological survey and spatial analysis study estimated dengue virus (DENV) transmission in schoolchildren (aged 5-19 years) in Medellín from 2010 to 2017.                                                                                    |
| Rueda, J. C., et al.           | 2019    | 1                                                                        | 1                                   | 1                         | 1                                                                | 0                               | 0                                                    | 1                     | 1                              | 1                     | 4           | Cross-sectional               | The objective of this study was to describe the demographics and clinical characteristics of suspected chikungunya cases in six Colombian cities.                                                                                                                |
| Sisooko, D., et al.            | 2008    | 1                                                                        | 1                                   | 1                         | 1                                                                | 1                               | 1                                                    | 1                     | 1                              | 1                     | 6           | Cross-sectional               | Household-based cross-sectional serosurvey to investigate the association between CHIKV seropositivity and risk factors.                                                                                                                                         |
| Soghater, M. A., et al.        | 2015    | 1                                                                        | 1                                   | 1                         | 1                                                                | 1                               | 1                                                    | 1                     | 1                              | 1                     | 6           | Cross-sectional               | The objective of this study was to identify socio-demographic factors associated with the prevalence of dengue serotypes in Katsina State in the eastern part of Nigeria.                                                                                        |

**Supplementary Table 1. Bias assessment using the Newcastle-Ottawa scale (NOS) for individual-level studies for cross-sectional and cohort (A) and case-control (B)**  
NOS

| Author(s)            | Year of publication | Total | Study design                | Study description                                                                                                                                                              |
|----------------------|---------------------|-------|-----------------------------|--------------------------------------------------------------------------------------------------------------------------------------------------------------------------------|
| Bonifay, T., et al.  | 2017                | 6     | Case (CHIKV)-control (DENV) | Study to describe the socioeconomic indicators of individuals infected with CHIKV and compare to those infected with DENV and the local population.                            |
| Luo, D., et al.      | 1995                | 8     | Case control                | Study examines children with Japanese encephalitis and compares them with neighborhood controls matched by age and sex in terms of several social and environmental variables. |
| Swain, S., et al.    | 2019                | 8     | Case-control                | The study aims to identify the social and ecological factors associated with emerging dengue in Odisha, India.                                                                 |
| Udayanga, L., et al. | 2018                | 4     | Case-control                | Evaluation of demographic, socio-economic and other associated risk factors affecting the                                                                                      |
