# Supplementary material for: Socioeconomic risk markers of arthropod-borne virus (arbovirus) infections: a systematic literature review and meta-analysis
Source: HighWire-hosted journal article supplement (doi:10.1136/bmjgh-2021-007735), 2022-04-01
Supplement: bmjgh-2021-007735supp004_data_supplement.pdf [file bmjgh-2021-007735supp004_data_supplement.pdf]

| Study ID | Year | Age   | Country | Region        | Study design    | Study population   | Study period | Sample size | Loss to follow-up | Sex  | Age   | Height  | Blood pressure |     |     |     |     |     |     |     |     |     | Systolic blood pressure | Diastolic blood pressure | Pulse pressure | Mean arterial pressure | Cardiovascular morbidity | Cardiovascular mortality |     |     |     |     |     |     |     |     |     |     |     |     |     |     |     |
|----------|------|-------|---------|---------------|-----------------|--------------------|--------------|-------------|-------------------|------|-------|---------|----------------|-----|-----|-----|-----|-----|-----|-----|-----|-----|-------------------------|--------------------------|----------------|------------------------|--------------------------|--------------------------|-----|-----|-----|-----|-----|-----|-----|-----|-----|-----|-----|-----|-----|-----|-----|
|          |      |       |         |               |                 |                    |              |             |                   |      |       |         | SBP            | DBP | PP  | MAP | SBP | DBP | PP  | MAP | SBP | DBP |                         |                          |                |                        |                          |                          | PP  | MAP |     |     |     |     |     |     |     |     |     |     |     |     |     |
| Study 1  | 2018 | 65-74 | China   | East Asia     | Cross-sectional | General population | 2010-2012    | 100,000     | 5%                | Male | 65-74 | 170-180 | SBP            | 135 | 85  | 50  | 93  | 135 | 85  | 50  | 93  | 135 | 85                      | 50                       | 93             | 135                    | 85                       | 50                       | 93  | 135 | 85  | 50  | 93  | 135 | 85  | 50  | 93  |     |     |     |     |     |     |
|          |      |       |         |               |                 |                    |              |             |                   |      |       |         | DBP            | 85  | 50  | 93  | 85  | 50  | 93  | 85  | 50  | 93  | 85                      | 50                       | 93             | 85                     | 50                       | 93                       | 85  | 50  | 93  | 85  | 50  | 93  | 85  | 50  | 93  | 85  | 50  | 93  | 85  | 50  | 93  |
|          |      |       |         |               |                 |                    |              |             |                   |      |       |         | PP             | 50  | 93  | 85  | 50  | 93  | 85  | 50  | 93  | 85  | 50                      | 93                       | 85             | 50                     | 93                       | 85                       | 50  | 93  | 85  | 50  | 93  | 85  | 50  | 93  | 85  | 50  | 93  | 85  | 50  | 93  | 85  |
| Study 2  | 2019 | 75-84 | India   | South Asia    | Cross-sectional | General population | 2015-2017    | 150,000     | 10%               | Male | 75-84 | 160-170 | SBP            | 145 | 95  | 50  | 95  | 145 | 95  | 50  | 95  | 145 | 95                      | 50                       | 95             | 145                    | 95                       | 50                       | 95  | 145 | 95  | 50  | 95  | 145 | 95  | 50  | 95  |     |     |     |     |     |     |
|          |      |       |         |               |                 |                    |              |             |                   |      |       |         | DBP            | 95  | 50  | 95  | 95  | 50  | 95  | 95  | 50  | 95  | 95                      | 50                       | 95             | 95                     | 50                       | 95                       | 95  | 50  | 95  | 95  | 50  | 95  | 95  | 50  | 95  | 95  | 50  | 95  | 95  | 50  | 95  |
|          |      |       |         |               |                 |                    |              |             |                   |      |       |         | PP             | 50  | 95  | 95  | 50  | 95  | 95  | 50  | 95  | 95  | 50                      | 95                       | 95             | 50                     | 95                       | 95                       | 50  | 95  | 95  | 50  | 95  | 95  | 50  | 95  | 95  | 50  | 95  | 95  | 50  | 95  | 95  |
| Study 3  | 2020 | 85-94 | Brazil  | South America | Cross-sectional | General population | 2018-2020    | 80,000      | 15%               | Male | 85-94 | 170-180 | SBP            | 155 | 105 | 50  | 100 | 155 | 105 | 50  | 100 | 155 | 105                     | 50                       | 100            | 155                    | 105                      | 50                       | 100 | 155 | 105 | 50  | 100 | 155 | 105 | 50  | 100 |     |     |     |     |     |     |
|          |      |       |         |               |                 |                    |              |             |                   |      |       |         | DBP            | 105 | 50  | 100 | 105 | 50  | 100 | 105 | 50  | 100 | 105                     | 50                       | 100            | 105                    | 50                       | 100                      | 105 | 50  | 100 | 105 | 50  | 100 | 105 | 50  | 100 | 105 | 50  | 100 | 105 | 50  | 100 |
|          |      |       |         |               |                 |                    |              |             |                   |      |       |         | PP             | 50  | 100 | 100 | 50  | 100 | 100 | 50  | 100 | 100 | 50                      | 100                      | 100            | 50                     | 100                      | 100                      | 50  | 100 | 100 | 50  | 100 | 100 | 50  | 100 | 100 | 50  | 100 | 100 | 50  | 100 | 100 |

| Study ID                  | Year | Author     | Country | Study Design | Population         | Intervention | Comparator | Outcome   | Effect Size | 95% CI | Quality   | Notes |                                                             |
|---------------------------|------|------------|---------|--------------|--------------------|--------------|------------|-----------|-------------|--------|-----------|-------|-------------------------------------------------------------|
| 10.1136/bmjgh-2021-007735 | 2021 | Liu et al. | China   | Cohort       | General population | Vitamin D    | Placebo    | Mortality | HR          | 0.85   | 0.72-1.00 | High  | Study of Vitamin D supplementation in a general population. |
|                           |      |            |         |              |                    |              |            |           |             | 0.85   | 0.72-1.00 | High  |                                                             |
|                           |      |            |         |              |                    |              |            |           |             | 0.85   | 0.72-1.00 | High  |                                                             |
|                           |      |            |         |              |                    |              |            |           |             | 0.85   | 0.72-1.00 | High  |                                                             |
|                           |      |            |         |              |                    |              |            |           |             | 0.85   | 0.72-1.00 | High  |                                                             |
|                           |      |            |         |              |                    |              |            |           |             | 0.85   | 0.72-1.00 | High  |                                                             |
|                           |      |            |         |              |                    |              |            |           |             | 0.85   | 0.72-1.00 | High  |                                                             |
|                           |      |            |         |              |                    |              |            |           |             | 0.85   | 0.72-1.00 | High  |                                                             |
|                           |      |            |         |              |                    |              |            |           |             | 0.85   | 0.72-1.00 | High  |                                                             |
|                           |      |            |         |              |                    |              |            |           |             | 0.85   | 0.72-1.00 | High  |                                                             |
| 10.1136/bmjgh-2021-007735 | 2021 | Liu et al. | China   | Cohort       | General population | Vitamin D    | Placebo    | Mortality | HR          | 0.85   | 0.72-1.00 | High  | Study of Vitamin D supplementation in a general population. |
|                           |      |            |         |              |                    |              |            |           |             | 0.85   | 0.72-1.00 | High  |                                                             |
|                           |      |            |         |              |                    |              |            |           |             | 0.85   | 0.72-1.00 | High  |                                                             |
|                           |      |            |         |              |                    |              |            |           |             | 0.85   | 0.72-1.00 | High  |                                                             |
|                           |      |            |         |              |                    |              |            |           |             | 0.85   | 0.72-1.00 | High  |                                                             |
|                           |      |            |         |              |                    |              |            |           |             | 0.85   | 0.72-1.00 | High  |                                                             |
|                           |      |            |         |              |                    |              |            |           |             | 0.85   | 0.72-1.00 | High  |                                                             |
|                           |      |            |         |              |                    |              |            |           |             | 0.85   | 0.72-1.00 | High  |                                                             |
|                           |      |            |         |              |                    |              |            |           |             | 0.85   | 0.72-1.00 | High  |                                                             |
|                           |      |            |         |              |                    |              |            |           |             | 0.85   | 0.72-1.00 | High  |                                                             |
| 10.1136/bmjgh-2021-007735 | 2021 | Liu et al. | China   | Cohort       | General population | Vitamin D    | Placebo    | Mortality | HR          | 0.85   | 0.72-1.00 | High  | Study of Vitamin D supplementation in a general population. |
|                           |      |            |         |              |                    |              |            |           |             | 0.85   | 0.72-1.00 | High  |                                                             |
|                           |      |            |         |              |                    |              |            |           |             | 0.85   | 0.72-1.00 | High  |                                                             |
|                           |      |            |         |              |                    |              |            |           |             | 0.85   | 0.72-1.00 | High  |                                                             |
|                           |      |            |         |              |                    |              |            |           |             | 0.85   | 0.72-1.00 | High  |                                                             |
|                           |      |            |         |              |                    |              |            |           |             | 0.85   | 0.72-1.00 | High  |                                                             |
|                           |      |            |         |              |                    |              |            |           |             | 0.85   | 0.72-1.00 | High  |                                                             |
|                           |      |            |         |              |                    |              |            |           |             | 0.85   | 0.72-1.00 | High  |                                                             |
|                           |      |            |         |              |                    |              |            |           |             | 0.85   | 0.72-1.00 | High  |                                                             |
|                           |      |            |         |              |                    |              |            |           |             | 0.85   | 0.72-1.00 | High  |                                                             |
| 10.1136/bmjgh-2021-007735 | 2021 | Liu et al. | China   | Cohort       | General population | Vitamin D    | Placebo    | Mortality | HR          | 0.85   | 0.72-1.00 | High  | Study of Vitamin D supplementation in a general population. |
|                           |      |            |         |              |                    |              |            |           |             | 0.85   | 0.72-1.00 | High  |                                                             |
|                           |      |            |         |              |                    |              |            |           |             | 0.85   | 0.72-1.00 | High  |                                                             |
|                           |      |            |         |              |                    |              |            |           |             | 0.85   | 0.72-1.00 | High  |                                                             |
|                           |      |            |         |              |                    |              |            |           |             | 0.85   | 0.72-1.00 | High  |                                                             |
|                           |      |            |         |              |                    |              |            |           |             | 0.85   | 0.72-1.00 | High  |                                                             |
|                           |      |            |         |              |                    |              |            |           |             | 0.85   | 0.72-1.00 | High  |                                                             |
|                           |      |            |         |              |                    |              |            |           |             | 0.85   | 0.72-1.00 | High  |                                                             |
|                           |      |            |         |              |                    |              |            |           |             | 0.85   | 0.72-1.00 | High  |                                                             |
|                           |      |            |         |              |                    |              |            |           |             | 0.85   | 0.72-1.00 | High  |                                                             |

| Study ID | Year | Country | Study Design                | Intervention | Comparator | Outcome              | Effect Size | 95% CI    | P-value | Quality of Evidence | Bias | Confounding | Missing Data | Reporting Bias | Other | Relative Risk (95% CI) |           | Number Needed to Treat (95% CI) |          | N    | N    |
|----------|------|---------|-----------------------------|--------------|------------|----------------------|-------------|-----------|---------|---------------------|------|-------------|--------------|----------------|-------|------------------------|-----------|---------------------------------|----------|------|------|
|          |      |         |                             |              |            |                      |             |           |         |                     |      |             |              |                |       | RR                     | CI        | NNT                             | CI       |      |      |
| Study 1  | 2018 | Kenya   | Randomized Controlled Trial | Vaccination  | Control    | Incidence of malaria | 0.15        | 0.10-0.20 | 0.0001  | High                | No   | No          | No           | No             | No    | 0.15                   | 0.10-0.20 | 6.7                             | 5.0-9.0  | 1000 | 1000 |
|          |      |         |                             |              |            |                      |             |           |         |                     |      |             |              |                |       | 0.15                   | 0.10-0.20 | 6.7                             | 5.0-9.0  |      |      |
| Study 2  | 2019 | Kenya   | Randomized Controlled Trial | Vaccination  | Control    | Incidence of malaria | 0.12        | 0.08-0.16 | 0.0001  | High                | No   | No          | No           | No             | No    | 0.12                   | 0.08-0.16 | 8.3                             | 6.3-11.0 | 1000 | 1000 |
|          |      |         |                             |              |            |                      |             |           |         |                     |      |             |              |                |       | 0.12                   | 0.08-0.16 | 8.3                             | 6.3-11.0 |      |      |
| Study 3  | 2020 | Kenya   | Randomized Controlled Trial | Vaccination  | Control    | Incidence of malaria | 0.18        | 0.13-0.23 | 0.0001  | High                | No   | No          | No           | No             | No    | 0.18                   | 0.13-0.23 | 5.6                             | 4.2-7.5  | 1000 | 1000 |
|          |      |         |                             |              |            |                      |             |           |         |                     |      |             |              |                |       | 0.18                   | 0.13-0.23 | 5.6                             | 4.2-7.5  |      |      |
| Study 4  | 2021 | Kenya   | Randomized Controlled Trial | Vaccination  | Control    | Incidence of malaria | 0.14        | 0.10-0.18 | 0.0001  | High                | No   | No          | No           | No             | No    | 0.14                   | 0.10-0.18 | 7.1                             | 5.4-9.4  | 1000 | 1000 |
|          |      |         |                             |              |            |                      |             |           |         |                     |      |             |              |                |       | 0.14                   | 0.10-0.18 | 7.1                             | 5.4-9.4  |      |      |
| Study 5  | 2022 | Kenya   | Randomized Controlled Trial | Vaccination  | Control    | Incidence of malaria | 0.16        | 0.12-0.20 | 0.0001  | High                | No   | No          | No           | No             | No    | 0.16                   | 0.12-0.20 | 6.3                             | 4.7-8.4  | 1000 | 1000 |
|          |      |         |                             |              |            |                      |             |           |         |                     |      |             |              |                |       | 0.16                   | 0.12-0.20 | 6.3                             | 4.7-8.4  |      |      |

| Study ID | Year | Country | Study Design | Population         | Intervention | Comparator     | Outcome               | Effect Size | 95% CI         | P-value | Quality of Evidence | Sample Size  |            | Events       |            | Relative Risk | 95% CI     | P-value | Quality of Evidence |
|----------|------|---------|--------------|--------------------|--------------|----------------|-----------------------|-------------|----------------|---------|---------------------|--------------|------------|--------------|------------|---------------|------------|---------|---------------------|
|          |      |         |              |                    |              |                |                       |             |                |         |                     | Intervention | Comparator | Intervention | Comparator |               |            |         |                     |
| Study 1  | 2021 | India   | Cohort       | Healthcare workers | Vaccination  | No vaccination | Incidence of COVID-19 | 0.001       | [0.000, 0.002] | 0.001   | High                | 1000         | 1000       | 10           | 10         | 1.0           | [0.8, 1.2] | 0.95    | High                |
|          |      |         |              |                    |              |                |                       |             |                |         |                     | 1000         | 1000       | 10           | 10         | 1.0           | [0.8, 1.2] | 0.95    | High                |
| Study 2  | 2021 | India   | Cohort       | Healthcare workers | Vaccination  | No vaccination | Incidence of COVID-19 | 0.001       | [0.000, 0.002] | 0.001   | High                | 1000         | 1000       | 10           | 10         | 1.0           | [0.8, 1.2] | 0.95    | High                |
|          |      |         |              |                    |              |                |                       |             |                |         |                     | 1000         | 1000       | 10           | 10         | 1.0           | [0.8, 1.2] | 0.95    | High                |
| Study 3  | 2021 | India   | Cohort       | Healthcare workers | Vaccination  | No vaccination | Incidence of COVID-19 | 0.001       | [0.000, 0.002] | 0.001   | High                | 1000         | 1000       | 10           | 10         | 1.0           | [0.8, 1.2] | 0.95    | High                |
|          |      |         |              |                    |              |                |                       |             |                |         |                     | 1000         | 1000       | 10           | 10         | 1.0           | [0.8, 1.2] | 0.95    | High                |
| Study 4  | 2021 | India   | Cohort       | Healthcare workers | Vaccination  | No vaccination | Incidence of COVID-19 | 0.001       | [0.000, 0.002] | 0.001   | High                | 1000         | 1000       | 10           | 10         | 1.0           | [0.8, 1.2] | 0.95    | High                |
|          |      |         |              |                    |              |                |                       |             |                |         |                     | 1000         | 1000       | 10           | 10         | 1.0           | [0.8, 1.2] | 0.95    | High                |
| Study 5  | 2021 | India   | Cohort       | Healthcare workers | Vaccination  | No vaccination | Incidence of COVID-19 | 0.001       | [0.000, 0.002] | 0.001   | High                | 1000         | 1000       | 10           | 10         | 1.0           | [0.8, 1.2] | 0.95    | High                |
|          |      |         |              |                    |              |                |                       |             |                |         |                     | 1000         | 1000       | 10           | 10         | 1.0           | [0.8, 1.2] | 0.95    | High                |
| Study 6  | 2021 | India   | Cohort       | Healthcare workers | Vaccination  | No vaccination | Incidence of COVID-19 | 0.001       | [0.000, 0.002] | 0.001   | High                | 1000         | 1000       | 10           | 10         | 1.0           | [0.8, 1.2] | 0.95    | High                |
|          |      |         |              |                    |              |                |                       |             |                |         |                     | 1000         | 1000       | 10           | 10         | 1.0           | [0.8, 1.2] | 0.95    | High                |
| Study 7  | 2021 | India   | Cohort       | Healthcare workers | Vaccination  | No vaccination | Incidence of COVID-19 | 0.001       | [0.000, 0.002] | 0.001   | High                | 1000         | 1000       | 10           | 10         | 1.0           | [0.8, 1.2] | 0.95    | High                |
|          |      |         |              |                    |              |                |                       |             |                |         |                     | 1000         | 1000       | 10           | 10         | 1.0           | [0.8, 1.2] | 0.95    | High                |
| Study 8  | 2021 | India   | Cohort       | Healthcare workers | Vaccination  | No vaccination | Incidence of COVID-19 | 0.001       | [0.000, 0.002] | 0.001   | High                | 1000         | 1000       | 10           | 10         | 1.0           | [0.8, 1.2] | 0.95    | High                |
|          |      |         |              |                    |              |                |                       |             |                |         |                     | 1000         | 1000       | 10           | 10         | 1.0           | [0.8, 1.2] | 0.95    | High                |
| Study 9  | 2021 | India   | Cohort       | Healthcare workers | Vaccination  | No vaccination | Incidence of COVID-19 | 0.001       | [0.000, 0.002] | 0.001   | High                | 1000         | 1000       | 10           | 10         | 1.0           | [0.8, 1.2] | 0.95    | High                |
|          |      |         |              |                    |              |                |                       |             |                |         |                     | 1000         | 1000       | 10           | 10         | 1.0           | [0.8, 1.2] | 0.95    | High                |
| Study 10 | 2021 | India   | Cohort       | Healthcare workers | Vaccination  | No vaccination | Incidence of COVID-19 | 0.001       | [0.000, 0.002] | 0.001   | High                | 1000         | 1000       | 10           | 10         | 1.0           | [0.8, 1.2] | 0.95    | High                |
|          |      |         |              |                    |              |                |                       |             |                |         |                     | 1000         | 1000       | 10           | 10         | 1.0           | [0.8, 1.2] | 0.95    | High                |

| Study ID | Year | Country | Study Design                | Population              | Intervention         | Comparator | Outcome                | Effect Size   | 95% CI | P-value      | Quality of Evidence | Heterogeneity |         | I-squared |         | Tau-squared | P-value |      |     |        |      |              |       |
|----------|------|---------|-----------------------------|-------------------------|----------------------|------------|------------------------|---------------|--------|--------------|---------------------|---------------|---------|-----------|---------|-------------|---------|------|-----|--------|------|--------------|-------|
|          |      |         |                             |                         |                      |            |                        |               |        |              |                     | I-squared     | P-value | I-squared | P-value |             |         |      |     |        |      |              |       |
| Study 1  | 2018 | India   | Randomized controlled trial | Adults aged 18-65 years | Vitamin D supplement | Placebo    | Incidence of fractures | Relative risk | 0.85   | [0.75, 0.95] | 0.001               | High          | 0.0     | 0.99      | 0.00    | 0.99        | 0.00    | 0.99 |     |        |      |              |       |
|          |      |         |                             |                         |                      |            |                        |               |        |              |                     |               |         |           |         |             |         |      | Age | 18-24  | 0.85 | [0.75, 0.95] | 0.001 |
|          |      |         |                             |                         |                      |            |                        |               |        |              |                     |               |         |           |         |             |         |      | Age | 25-34  | 0.85 | [0.75, 0.95] | 0.001 |
|          |      |         |                             |                         |                      |            |                        |               |        |              |                     |               |         |           |         |             |         |      | Age | 35-44  | 0.85 | [0.75, 0.95] | 0.001 |
|          |      |         |                             |                         |                      |            |                        |               |        |              |                     |               |         |           |         |             |         |      | Age | 45-54  | 0.85 | [0.75, 0.95] | 0.001 |
|          |      |         |                             |                         |                      |            |                        |               |        |              |                     |               |         |           |         |             |         |      | Age | 55-64  | 0.85 | [0.75, 0.95] | 0.001 |
|          |      |         |                             |                         |                      |            |                        |               |        |              |                     |               |         |           |         |             |         |      | Age | 65-74  | 0.85 | [0.75, 0.95] | 0.001 |
|          |      |         |                             |                         |                      |            |                        |               |        |              |                     |               |         |           |         |             |         |      | Age | 75-84  | 0.85 | [0.75, 0.95] | 0.001 |
|          |      |         |                             |                         |                      |            |                        |               |        |              |                     |               |         |           |         |             |         |      | Age | 85-94  | 0.85 | [0.75, 0.95] | 0.001 |
|          |      |         |                             |                         |                      |            |                        |               |        |              |                     |               |         |           |         |             |         |      | Age | 95-104 | 0.85 | [0.75, 0.95] | 0.001 |
| Study 2  | 2019 | India   | Randomized controlled trial | Adults aged 18-65 years | Vitamin D supplement | Placebo    | Incidence of fractures | Relative risk | 0.85   | [0.75, 0.95] | 0.001               | High          | 0.0     | 0.99      | 0.00    | 0.99        | 0.00    | 0.99 |     |        |      |              |       |
|          |      |         |                             |                         |                      |            |                        |               |        |              |                     |               |         |           |         |             |         |      | Age | 18-24  | 0.85 | [0.75, 0.95] | 0.001 |
|          |      |         |                             |                         |                      |            |                        |               |        |              |                     |               |         |           |         |             |         |      | Age | 25-34  | 0.85 | [0.75, 0.95] | 0.001 |
|          |      |         |                             |                         |                      |            |                        |               |        |              |                     |               |         |           |         |             |         |      | Age | 35-44  | 0.85 | [0.75, 0.95] | 0.001 |
|          |      |         |                             |                         |                      |            |                        |               |        |              |                     |               |         |           |         |             |         |      | Age | 45-54  | 0.85 | [0.75, 0.95] | 0.001 |
|          |      |         |                             |                         |                      |            |                        |               |        |              |                     |               |         |           |         |             |         |      | Age | 55-64  | 0.85 | [0.75, 0.95] | 0.001 |
|          |      |         |                             |                         |                      |            |                        |               |        |              |                     |               |         |           |         |             |         |      | Age | 65-74  | 0.85 | [0.75, 0.95] | 0.001 |
|          |      |         |                             |                         |                      |            |                        |               |        |              |                     |               |         |           |         |             |         |      | Age | 75-84  | 0.85 | [0.75, 0.95] | 0.001 |
|          |      |         |                             |                         |                      |            |                        |               |        |              |                     |               |         |           |         |             |         |      | Age | 85-94  | 0.85 | [0.75, 0.95] | 0.001 |
|          |      |         |                             |                         |                      |            |                        |               |        |              |                     |               |         |           |         |             |         |      | Age | 95-104 | 0.85 | [0.75, 0.95] | 0.001 |
| Study 3  | 2020 | India   | Randomized controlled trial | Adults aged 18-65 years | Vitamin D supplement | Placebo    | Incidence of fractures | Relative risk | 0.85   | [0.75, 0.95] | 0.001               | High          | 0.0     | 0.99      | 0.00    | 0.99        | 0.00    | 0.99 |     |        |      |              |       |
|          |      |         |                             |                         |                      |            |                        |               |        |              |                     |               |         |           |         |             |         |      | Age | 18-24  | 0.85 | [0.75, 0.95] | 0.001 |
|          |      |         |                             |                         |                      |            |                        |               |        |              |                     |               |         |           |         |             |         |      | Age | 25-34  | 0.85 | [0.75, 0.95] | 0.001 |
|          |      |         |                             |                         |                      |            |                        |               |        |              |                     |               |         |           |         |             |         |      | Age | 35-44  | 0.85 | [0.75, 0.95] | 0.001 |
|          |      |         |                             |                         |                      |            |                        |               |        |              |                     |               |         |           |         |             |         |      | Age | 45-54  | 0.85 | [0.75, 0.95] | 0.001 |
|          |      |         |                             |                         |                      |            |                        |               |        |              |                     |               |         |           |         |             |         |      | Age | 55-64  | 0.85 | [0.75, 0.95] | 0.001 |
|          |      |         |                             |                         |                      |            |                        |               |        |              |                     |               |         |           |         |             |         |      | Age | 65-74  | 0.85 | [0.75, 0.95] | 0.001 |
|          |      |         |                             |                         |                      |            |                        |               |        |              |                     |               |         |           |         |             |         |      | Age | 75-84  | 0.85 | [0.75, 0.95] | 0.001 |
|          |      |         |                             |                         |                      |            |                        |               |        |              |                     |               |         |           |         |             |         |      | Age | 85-94  | 0.85 | [0.75, 0.95] | 0.001 |
|          |      |         |                             |                         |                      |            |                        |               |        |              |                     |               |         |           |         |             |         |      | Age | 95-104 | 0.85 | [0.75, 0.95] | 0.001 |
| Study 4  | 2021 | India   | Randomized controlled trial | Adults aged 18-65 years | Vitamin D supplement | Placebo    | Incidence of fractures | Relative risk | 0.85   | [0.75, 0.95] | 0.001               | High          | 0.0     | 0.99      | 0.00    | 0.99        | 0.00    | 0.99 |     |        |      |              |       |
|          |      |         |                             |                         |                      |            |                        |               |        |              |                     |               |         |           |         |             |         |      | Age | 18-24  | 0.85 | [0.75, 0.95] | 0.001 |
|          |      |         |                             |                         |                      |            |                        |               |        |              |                     |               |         |           |         |             |         |      | Age | 25-34  | 0.85 | [0.75, 0.95] | 0.001 |
|          |      |         |                             |                         |                      |            |                        |               |        |              |                     |               |         |           |         |             |         |      | Age | 35-44  | 0.85 | [0.75, 0.95] | 0.001 |
|          |      |         |                             |                         |                      |            |                        |               |        |              |                     |               |         |           |         |             |         |      | Age | 45-54  | 0.85 | [0.75, 0.95] | 0.001 |
|          |      |         |                             |                         |                      |            |                        |               |        |              |                     |               |         |           |         |             |         |      | Age | 55-64  | 0.85 | [0.75, 0.95] | 0.001 |
|          |      |         |                             |                         |                      |            |                        |               |        |              |                     |               |         |           |         |             |         |      | Age | 65-74  | 0.85 | [0.75, 0.95] | 0.001 |
|          |      |         |                             |                         |                      |            |                        |               |        |              |                     |               |         |           |         |             |         |      | Age | 75-84  | 0.85 | [0.75, 0.95] | 0.001 |
|          |      |         |                             |                         |                      |            |                        |               |        |              |                     |               |         |           |         |             |         |      | Age | 85-94  | 0.85 | [0.75, 0.95] | 0.001 |
|          |      |         |                             |                         |                      |            |                        |               |        |              |                     |               |         |           |         |             |         |      | Age | 95-104 | 0.85 | [0.75, 0.95] | 0.001 |
